# Supplementary material for: Interseismic and long-term deformation of southeastern Sicily driven by the Ionian slab roll-back
Source: Copernicus journal article supplement (doi:10.5194/egusphere-2024-85), 2024-01-19
Supplement: Supplementary file 1 [file egusphere-2024-85-supplement.pdf]

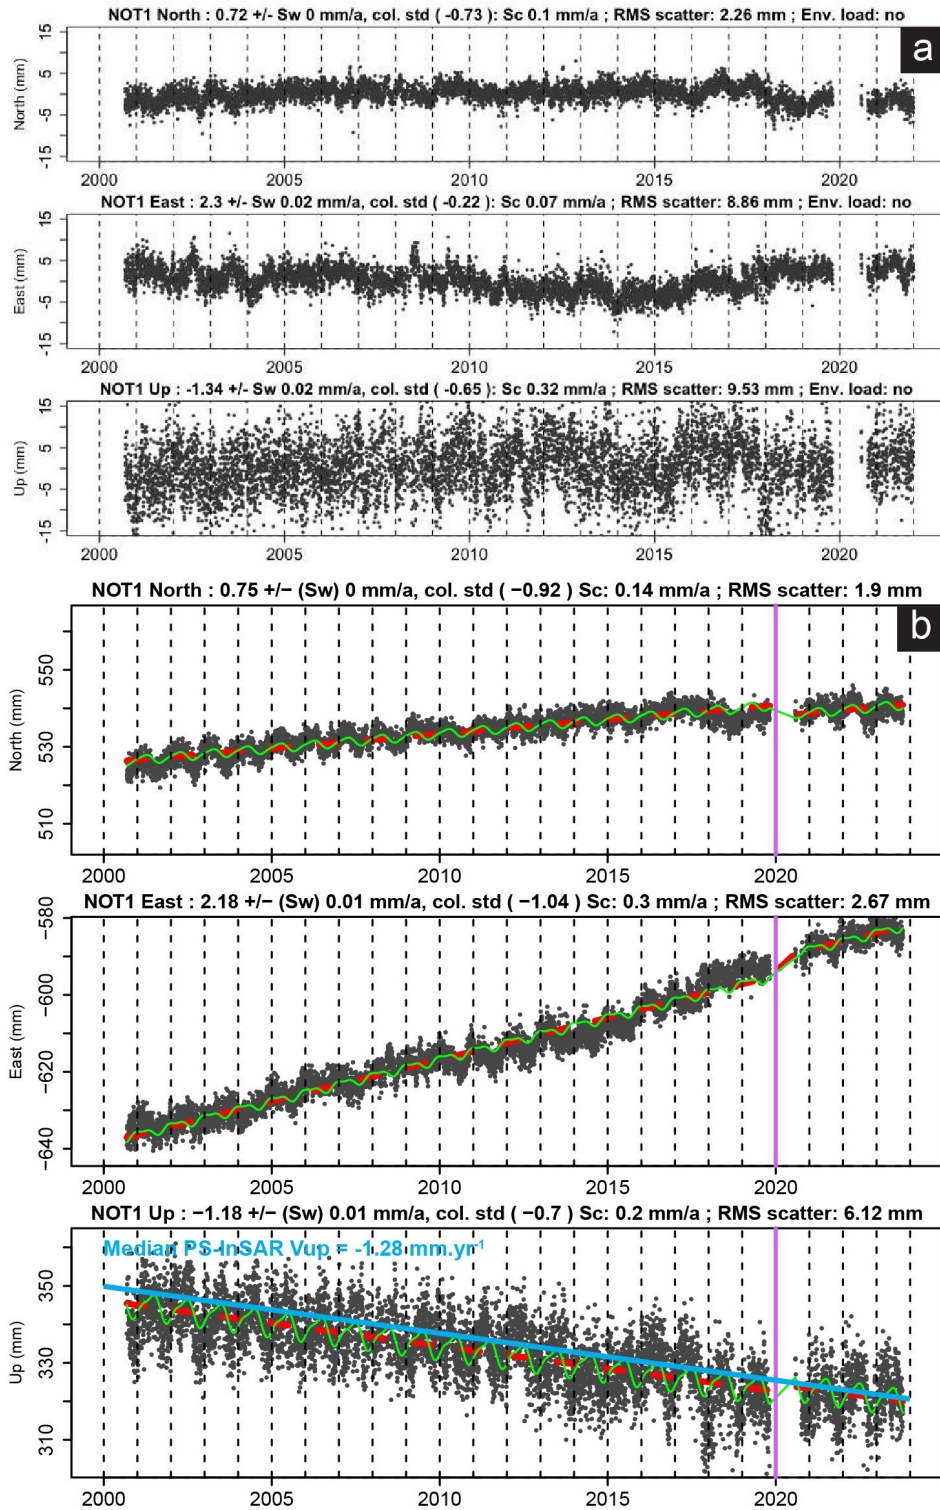

17 **Supplementary Figure S2:** a) Raw time series of the NOT1 GNSS station for the North, East and Up components. b) Time series models of the NOT1 GNSS station for the North, East and Up components using inversion software from Masson et al., 2019. Linear trend appears in red. Periodic or seasonal and pluriannual effects are in green. Corrected offsets are indicated by a purple vertical line. Data configuration above the signals: GPS station name; component (North, East or Up); velocity (mm/yr); white noise (Sw); noise color; 22 colored noise (Sc); dispersion (RMS). GNSS time series were obtained from the Nevada Geodetic Laboratory (Blewitt et al., 2018). PS-InSAR vertical velocities (see Figure 2) are extracted over 8 km<sup>2</sup> from the NOT1 station so that its median is correlated with the time series of the vertical component of NOT1 station.



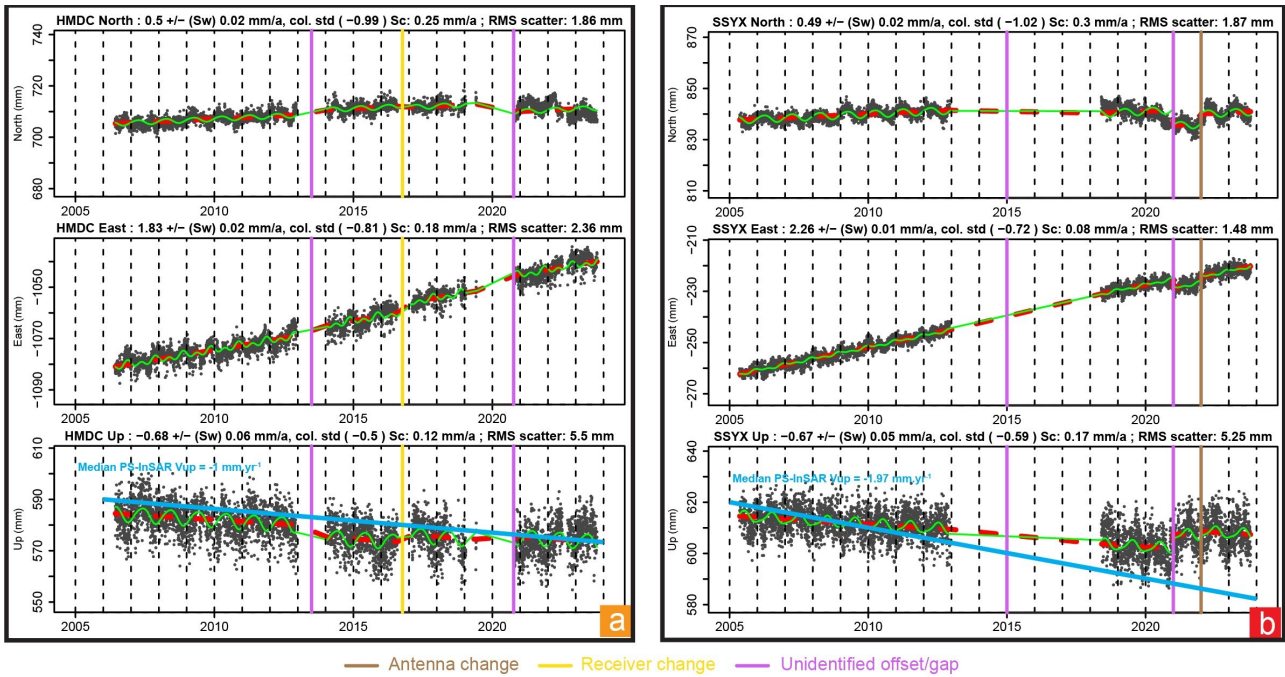

25 **Supplementary Figure S3:** Time series models of a) the HMDC GNSS station (shown in orange square for the  
 26 medium-quality of the time serie); b) the SSYX GNSS station (shown in red square for the doubtful-qual-  
 27 ity of the time serie) for the North, East and Up components using inversion software from Masson et al.,  
 28 2019. Linear trend in red. Periodic or seasonal and pluriannual effects in green. Offset and/or gap are identi-  
 29 fied by receiver or antenna changes from Fabian et al., 2021. Data configuration above the signals: GPS sta-  
 30 tion name; component (North, East or Up); velocity (mm/yr); white noise (Sw); noise color; colored noise  
 31 (Sc); dispersion (RMS). Displacement data from the Nevada Geodetic Laboratory (Blewitt et al., 2018). PS-  
 32 InSAR vertical velocities (see Figure 2) are extracted over  $8 \text{ km}^2$  from the SSYX and HMDC stations so that  
 33 its median is correlated with the time series of the vertical component of these GNSS stations.

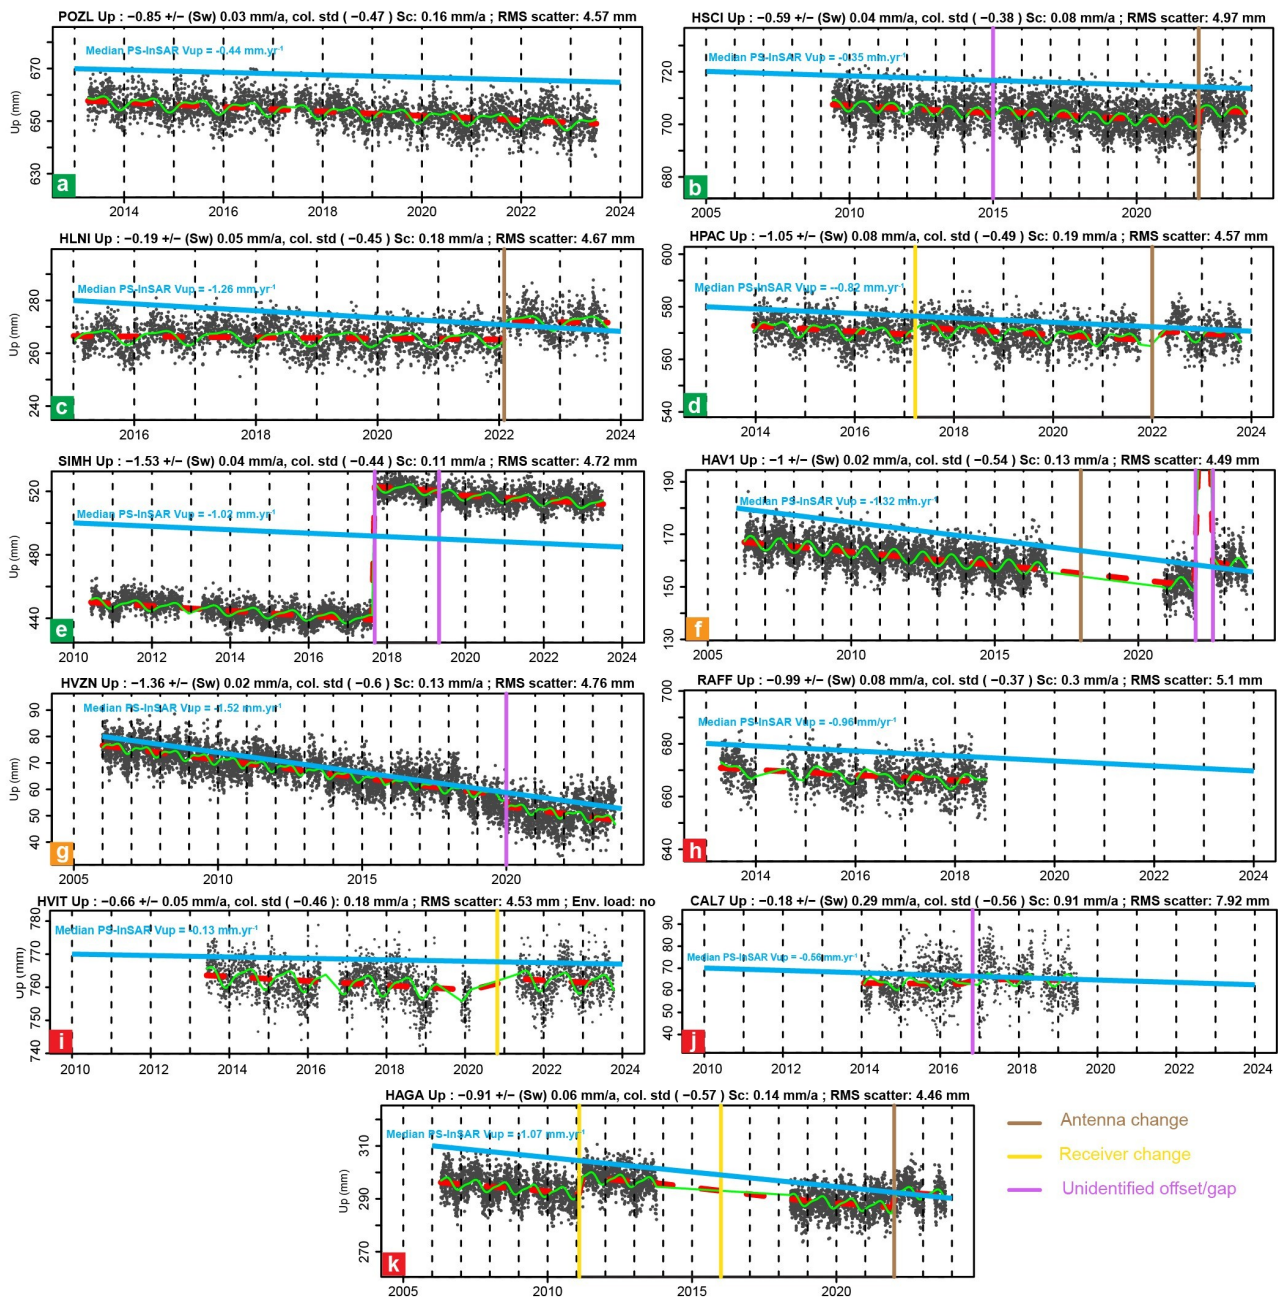

34 **Supplementary Figure S4:** a-e) Good-quality time series (> 8 years, few gaps and offsets) (represented by  
 35 a green square here and a thick GNSS station boundary in Figure 2a); f-g) Medium-quality time series (> 8  
 36 years with some gaps of several years and few offsets) shown in orange square; h-k) Doubtful-quality time  
 37 series (gaps of several years and high scattering) shown in red square; models of GNSS station Up compo-  
 38 nents using inversion software from Masson et al., 2019. Linear trend in red. Periodic or seasonal and pluri-  
 39 annual effects in green. Corrected offsets are indicated by a purple vertical line. Offset and/or gap are identi-  
 40 fied by receiver or antenna changes from Fabian et al., 2021. Data configuration above the signals: GNSS  
 41 station name; component (North, East or Up); velocity (mm/yr); white noise (Sw); noise color; colored noise  
 42 (Sc); dispersion (RMS). Displacement data from the Nevada Geodetic Laboratory (Blewitt et al., 2018). PS-  
 43 InSAR vertical velocities (see Figure 2) are extracted over 8 km<sup>2</sup> from the GNSS stations so that its median  
 44 is correlated with the time series of the vertical component of these GNSS stations.



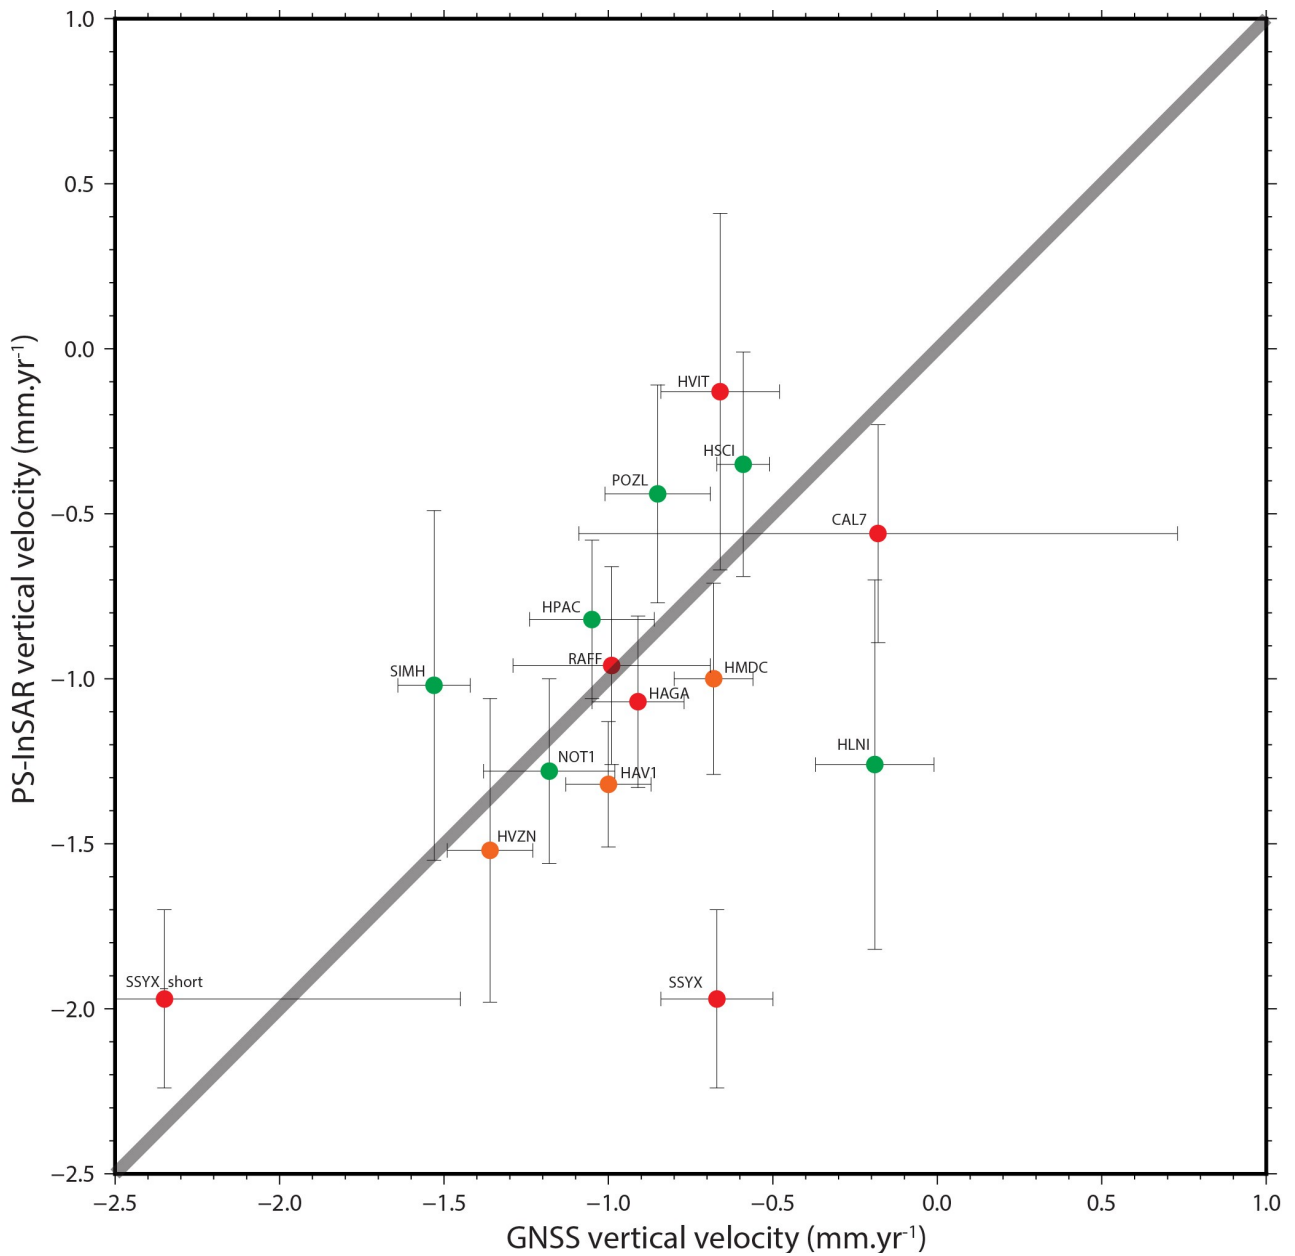

45 **Supplementary Figure S5:** Correlation between GNSS vertical velocity models and median of PS-InSAR  
 46 vertical velocities (see Figure 2) extracted over 8 km<sup>2</sup> from the GNSS stations. The uncertainty of PS-InSAR  
 47 data is calculated with the average standard deviation of PS-InSAR data over 8 km<sup>2</sup> around the GNSS sta-  
 48 tion. In green is the good-quality time series (> 8 years, few gaps and offsets), in orange is the medium-qual-  
 49 ity time series (> 8 years, few gaps of several years and few offsets), and in red is the doubtful-quality time  
 50 series (gaps of several years and high scattering). The SSYX\_short means the SSYX time series of 2018-  
 51 2023.

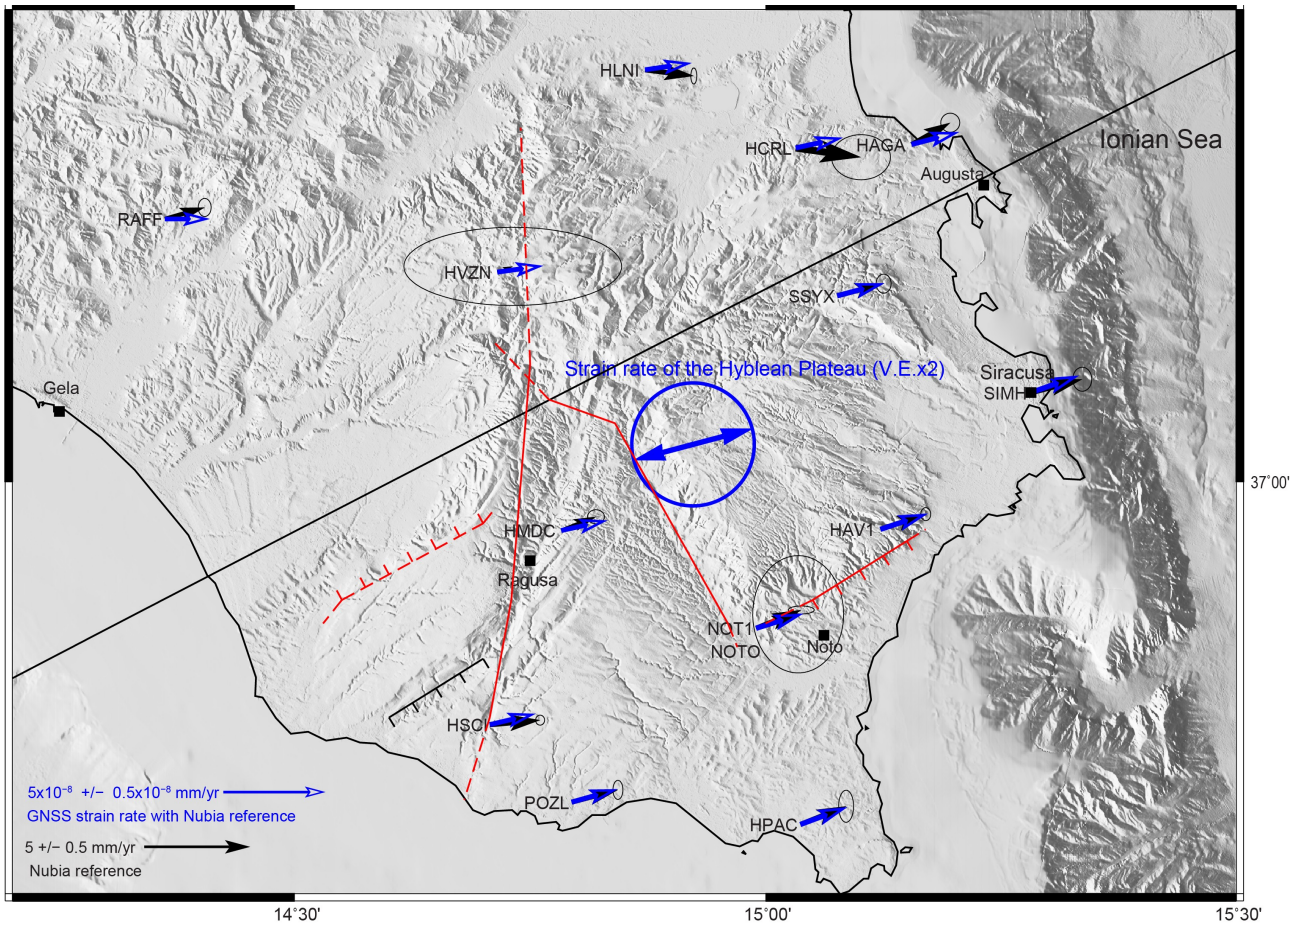

52 **Supplementary Figure S6:** Strain rate inversion of GNSS horizontal components (Figure 3) using the Maz-  
 53 zotti et al. (2005) software. Comparison between the GNSS strain rate inversion (blue vectors) and the  
 54 GNSS horizontal component models (black vectors) for each GNSS station of Hyblean Plateau. Global  
 55 GNSS strain rate inversion of the Hyblean Plateau has a horizontal exaggeration (V.E.x2).



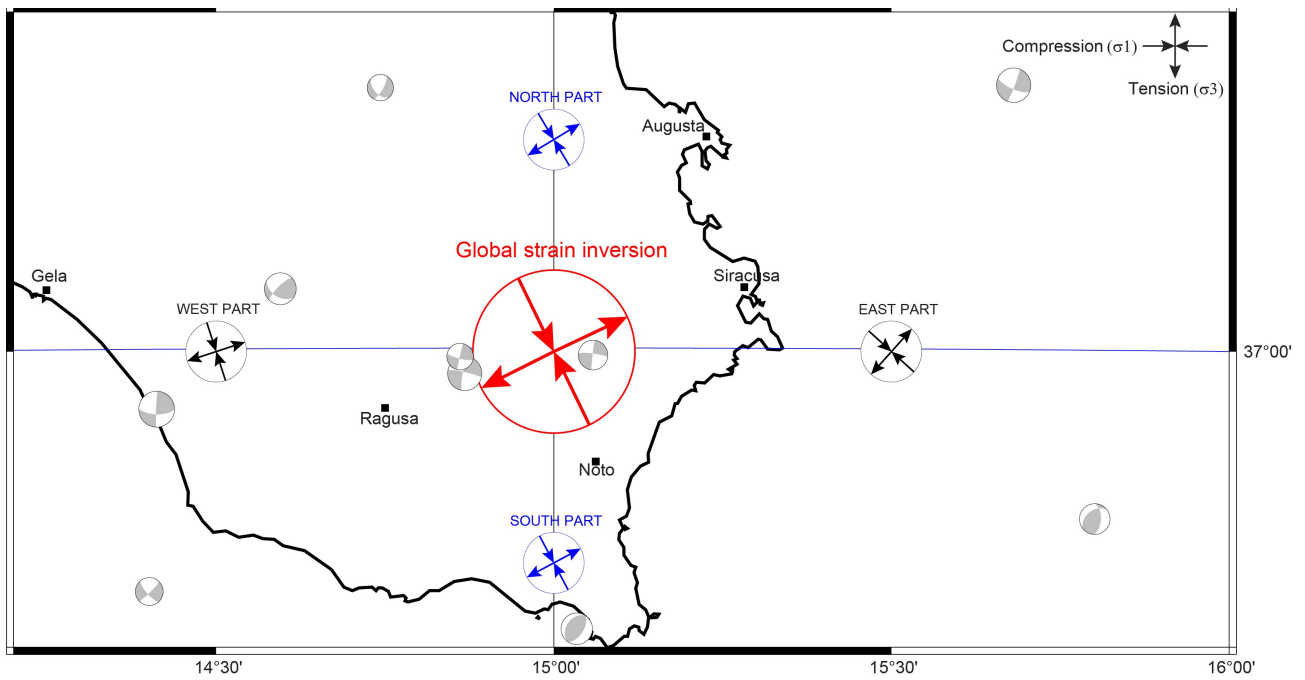

56 **Supplementary Figure S7:** Focal mechanisms inversion over Southeastern Sicily using Mickael's method  
 57 (Vavryčuk, 2014; Levandowski et al., 2018). The global strain inversion (red arrows) is consistent with local  
 58 strain inversion performed on four subregions dividing SE Sicily. North and South subregions are delimited  
 59 by the blue line. West and East subregions are delimited by the black line.

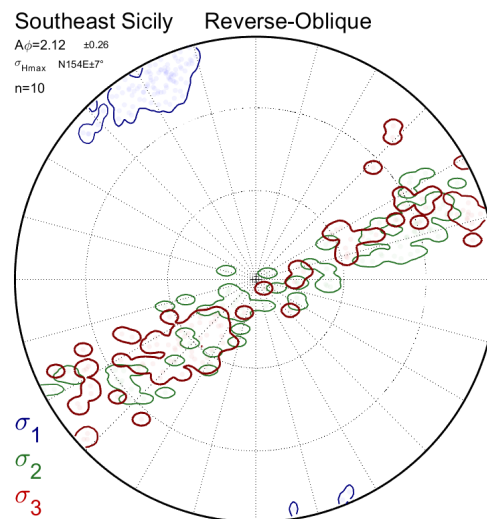

60 **Supplementary Figure S8:** Global stress tensor of focal mechanisms of southeast Sicily (Figure 3 and Sup-  
 61 plementary Figure S7) using the Mickael's method (Vavryčuk, 2014; Levandowski et al., 2018).

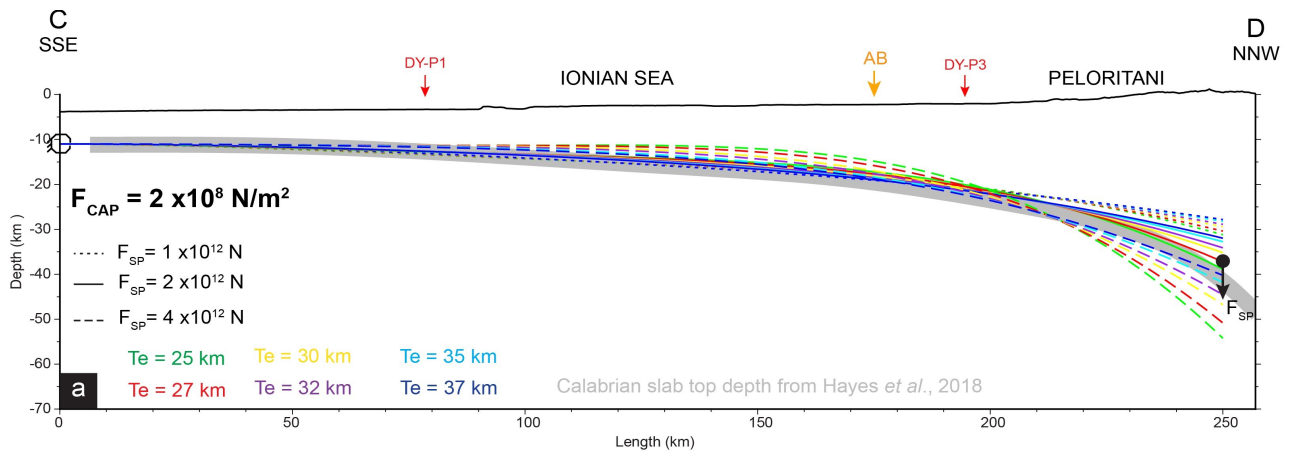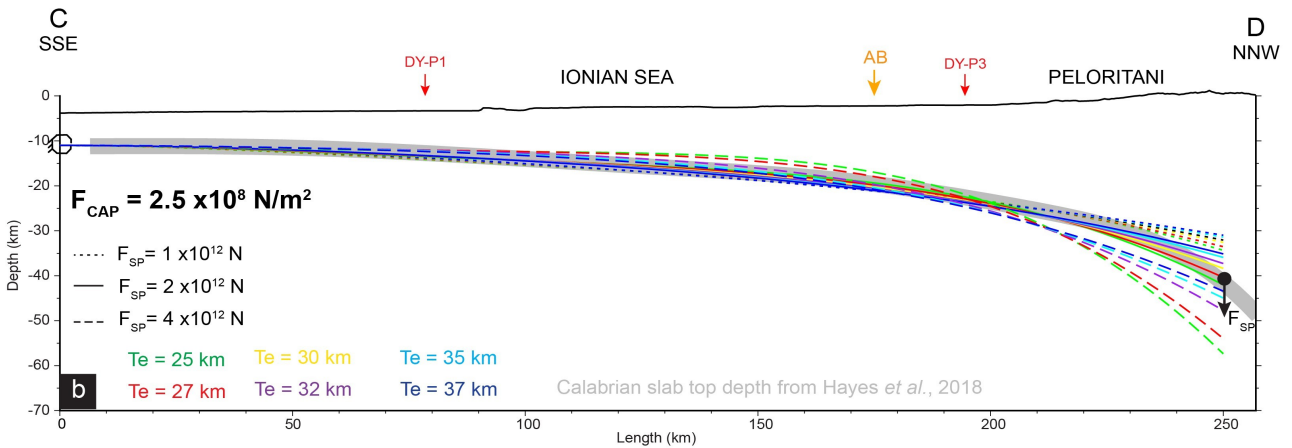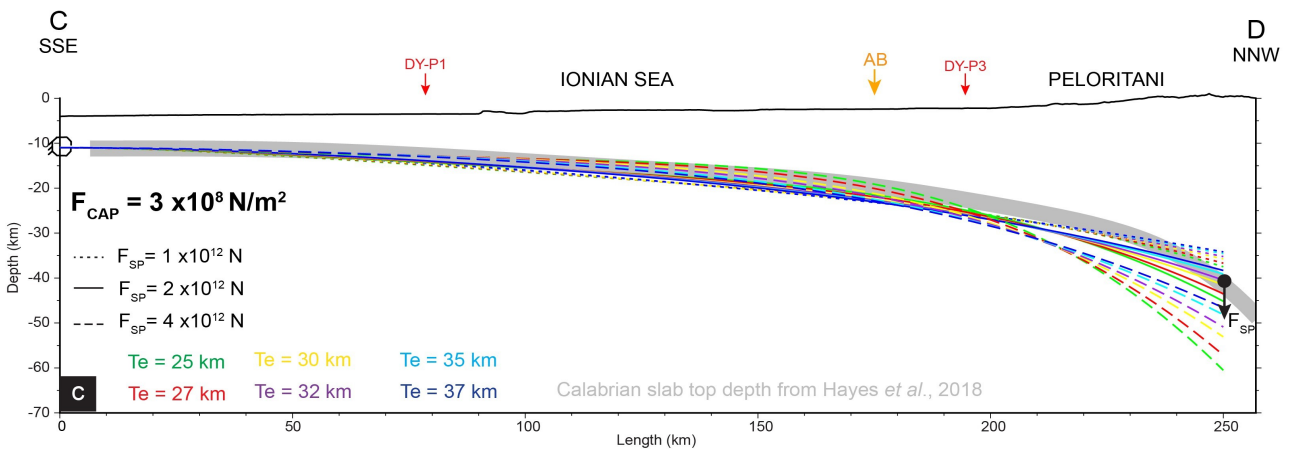

| d | F <sub>SP</sub> | 1 x 10 <sup>12</sup> N               |                                        |                                      | 2 x 10 <sup>12</sup> N               |                                        |                                      | 4 x 10 <sup>12</sup> N               |                                        |                                      | RMS (km) |
|---|-----------------|--------------------------------------|----------------------------------------|--------------------------------------|--------------------------------------|----------------------------------------|--------------------------------------|--------------------------------------|----------------------------------------|--------------------------------------|----------|
|   |                 | 2 x 10 <sup>8</sup> N/m <sup>2</sup> | 2.5 x 10 <sup>8</sup> N/m <sup>2</sup> | 3 x 10 <sup>8</sup> N/m <sup>2</sup> | 2 x 10 <sup>8</sup> N/m <sup>2</sup> | 2.5 x 10 <sup>8</sup> N/m <sup>2</sup> | 3 x 10 <sup>8</sup> N/m <sup>2</sup> | 2 x 10 <sup>8</sup> N/m <sup>2</sup> | 2.5 x 10 <sup>8</sup> N/m <sup>2</sup> | 3 x 10 <sup>8</sup> N/m <sup>2</sup> |          |
|   | Te              |                                      |                                        |                                      |                                      |                                        |                                      |                                      |                                        |                                      |          |
|   | 25 km           | 2.4                                  | 1.5                                    | 2.2                                  | 1.4                                  | 0.8                                    | 2.3                                  | 4.2                                  | 4.5                                    | 5.4                                  |          |
|   | 27 km           | 2.5                                  | 1.6                                    | 2.3                                  | 1.4                                  | 0.7                                    | 2.2                                  | 3.5                                  | 3.9                                    | 4.9                                  |          |
|   | 30 km           | 2.6                                  | 1.8                                    | 2.3                                  | 1.4                                  | 0.7                                    | 2.2                                  | 2.6                                  | 3.1                                    | 4.2                                  |          |
|   | 32 km           | 2.7                                  | 1.9                                    | 2.3                                  | 1.6                                  | 0.8                                    | 2.2                                  | 2.1                                  | 2.6                                    | 3.9                                  |          |
|   | 35 km           | 2.9                                  | 2.0                                    | 2.4                                  | 1.8                                  | 1.0                                    | 2.2                                  | 1.5                                  | 2.1                                    | 3.5                                  |          |
|   | 37 km           | 2.9                                  | 2.1                                    | 2.4                                  | 1.9                                  | 1.2                                    | 2.2                                  | 1.2                                  | 1.9                                    | 3.4                                  |          |

62 **Supplementary Figure S9:** Numerical models (gFlex from Wickert, 2016) of the oceanic lithosphere flexure  
63 were run with a broken plate with no-bending moment and no shear at the northern end of the CD profile,  
64 and a no-displacement condition at its southern end. The ante-Messinian cover and the CAP load are repre-  
65 sented as a linear gradient with a maximum CAP load a) of  $2 \times 10^8 \text{ N/m}^2$ , b) of  $2.5 \times 10^8 \text{ N/m}^2$ , and c) of  $3 \times 10^8$   
66  $\text{N/m}^2$ . We performed a slab pull of  $1 \times 10^{12} \text{ N}$  (dashed lines),  $2 \times 10^{12} \text{ N}$  (continuous lines), and  $4 \times 10^{12} \text{ N}$  (dot-



67 *ted lines) bending of the oceanic lithosphere. We investigated elastic thickness ( $T_e$ ) of 25-37 km for the same*  
 68 *model parameters. We represented the model with elastic thicknesses of 25 km (in green), 27 km (in red), 30*  
 69 *km (in yellow), 32 km (in purple), 35 km (in cyan), and 37 km (in blue) d) Misfit (RMS in km) of Calabrian slab*  
 70 *top depth (Hayes, 2018) (in gray) interpolated on each model. The shaded cells are models represented in*  
 71 *Figure 5.*

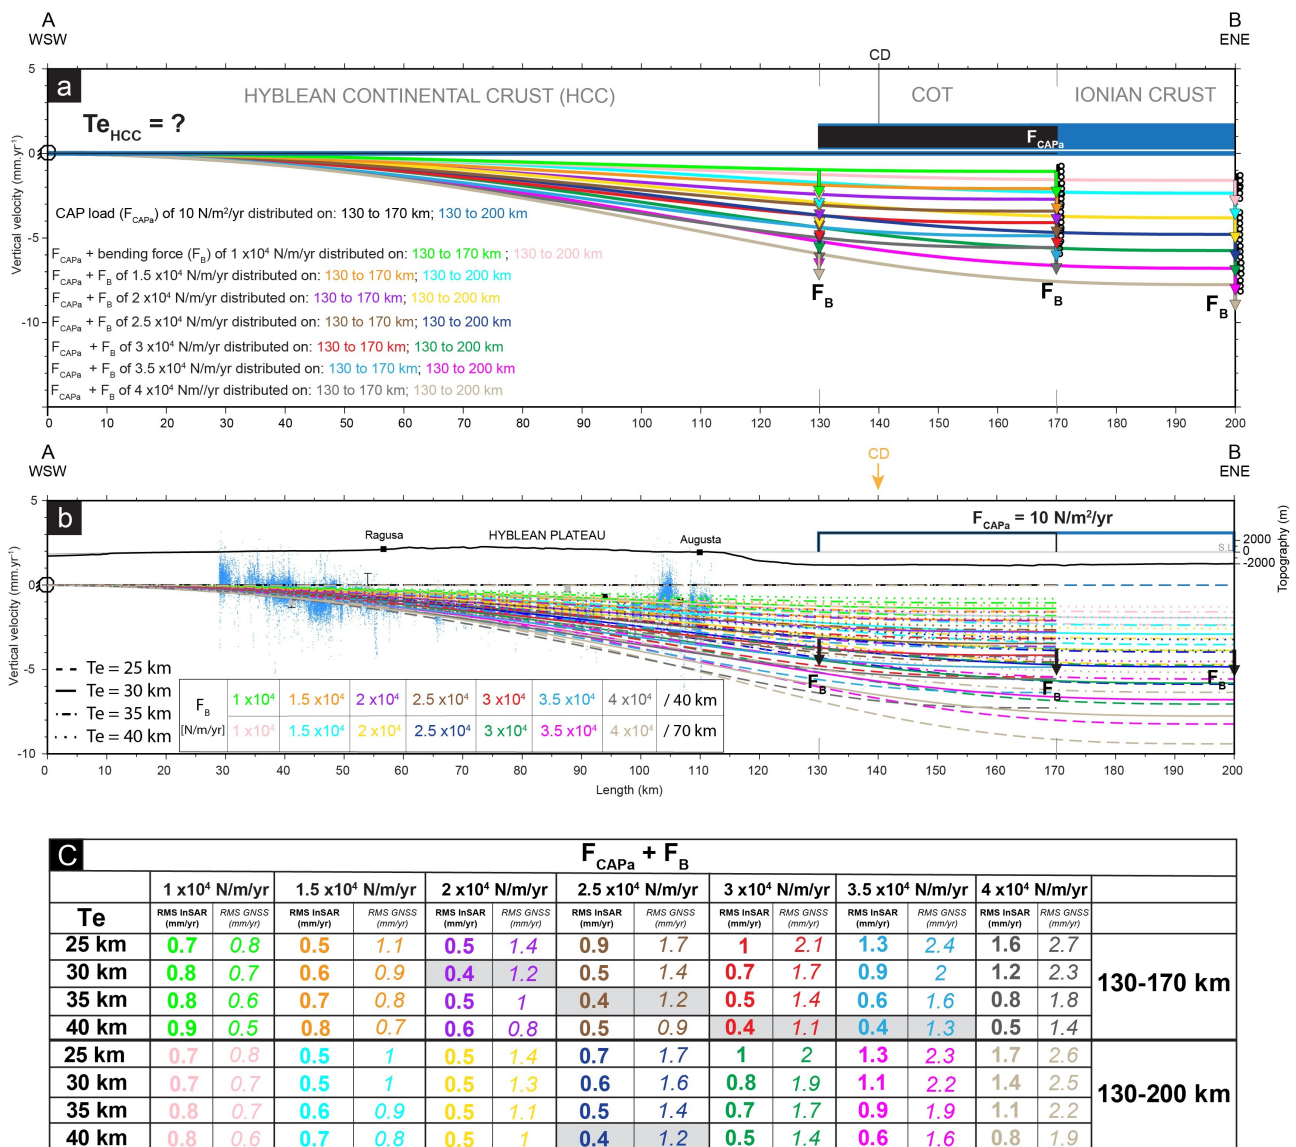

72 **Supplementary Figure S10:** a) Continental crustal flexure controlled by the retreat of the Ionian slab along  
 73 the AB profile. We performed the only Calabrian accretionary prism (CAP) load ( $F_{CAPa}$ ) of  $10 \text{ N/m}^2/\text{yr}$  (black  
 74 line), the CAP load and the bending force ( $F_B$ ) of  $1 \times 10^4 \text{ N/m/yr}$  (light green line),  $1.5 \times 10^4 \text{ N/m/yr}$  (orange  
 75 line),  $2 \times 10^4 \text{ N/m/yr}$  (purple line),  $2.5 \times 10^4 \text{ N/m/yr}$  (brown line),  $3 \times 10^4 \text{ N/m/yr}$  (red line),  $3.5 \times 10^4 \text{ N/m/yr}$  (light  
 76 blue line) or  $4 \times 10^4 \text{ N/m/yr}$  (gray line) are distributed entirely on 1-km-long segments on the continent-ocean  
 77 transition (COT), so 130 to 170 km of the AB profile. We test, then, the only CAP load ( $10 \text{ N/m}^2/\text{yr}$ ) (blue line),  
 78 the CAP load and the bending force of  $1 \times 10^4 \text{ N/m/yr}$  (pink line),  $1.5 \times 10^4 \text{ N/m/yr}$  (cyan line),  $2 \times 10^4 \text{ N/m/yr}$   
 79 (yellow line),  $2.5 \times 10^4 \text{ N/m/yr}$  (dark blue line),  $3 \times 10^4 \text{ N/m/yr}$  (green line),  $3.5 \times 10^4 \text{ N/m/yr}$  (magenta line) or  $4$   
 80  $\times 10^4 \text{ N/m/yr}$  (light brown line) distributed on 1-km-long segments on the COT and western of the Ionian crust,  
 81 so 130 to 200 km of the AB profile b) Numerical models (gFlex from Wickert, 2016) were run with no-dis-  
 82 placement boundary condition at the southwestern profile end and a free displacement of a horizontally  
 83 clamped boundary condition at the northeastern profile end. The CAP load and the bending force are per-  
 84 formed from 130 to 200 km length (blue, pink, cyan, yellow dark blue, green, light blue and gray lines) and  
 85 from 130 to 170 km length (black, light green, orange, purple, brown, red, magenta and light brown lines).  
 86 Hyblean crustal flexure are performed with different elastic thickness of 25 km (dashed lines), 30 km (contin-  
 87 uous lines), 35 km (dotted-dashed lines), and 40 km (dotted lines). Profile of PS-InSAR velocities  $U_p$  (in  
 88 blue) and GNSS velocities  $U_p$  (NGL) with their uncertainties stacked in 20 km (in black) and 40 km (in gray)  
 89 along the profile AB (see location in Figure 2). Topographic and bathymetric profile are presented without

90 vertical exaggeration ( $VE=1$ ). c) Misfit (RMS in mm/yr) of the PS-InSAR and GNSS (see b) interpolated on  
 91 different models. The shaded cells are best models according to the RMS PS-InSAR value, and these mod-  
 92 els are represented in Figure 6b.

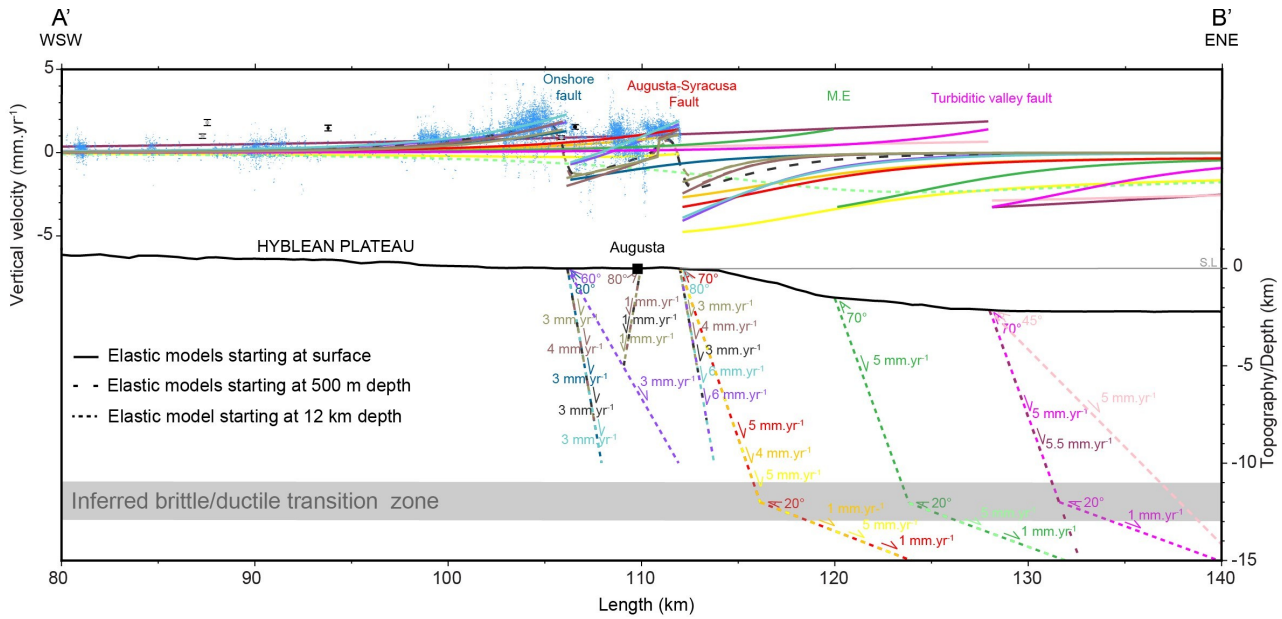

93 **Supplementary Figure S11:** Interseismic loading numerical models (Coulomb 3.4) of offshore inferred ac-  
 94 tive or active normals faults at the eastern Hyblean Platform have a step of 100 m. Profile of PS-InSAR ve-  
 95 locities Up (in blue) are the reference frame for models, and were stacked across a 5 km width on both sides  
 96 of the AB profile in Figure 7b (in blue). Modeled elastic deformation: the turbiditic valley normal fault identified  
 97 by Gutscher et al., 2016 (magenta, dark pink and pink lines); the Malta Escarpment (M.E) (green and light  
 98 green lines); the Augusta-Siracusa coastal fault (red, orange and yellow lines); onshore inferred active faults  
 99 in Augusta (dark blue line). Modeled interseismic deformation: the Augusta-Siracusa coastal fault plus on-  
 100 shore inferred active faults are represented in light blue, dark and light brown lines). Topography/depth is  
 101 represented without vertical exaggeration ( $VE \times 1$ ).

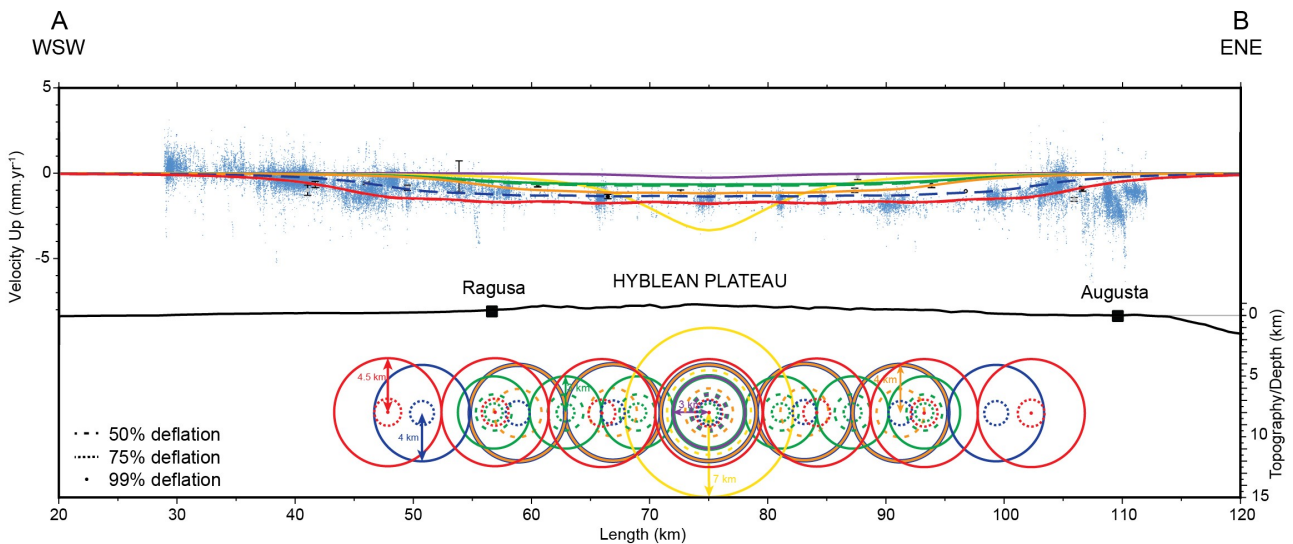

102 **Supplementary Figure S12:** Volcanic material deflation model (Mogi, 1958) in central Hyblean Plateau. Vol-  
 103 canic material is represented by a sphere or several spheres located at 8 km depth according to Henriquet et  
 104 al., 2019. A sphere of 3 km radius (in purple) and 7 km radius (in yellow) are tested with a 50% deflation  
 105 (dashed line). Seven spheres of a 3 km radius (in green) have been constrained by 50% deflation (dashed  
 106 line), and 75% deflation (dotted line). Five spheres of 4 km radius (in orange) were performed with 50% de-  
 107 flation (dashed line). Seven spheres of 4 km radius (in blue) were performed with 75% deflation (dotted line).  
 108 Seven spheres of 4.5 km radius (in red) were performed with 75% (dotted line) and 99% (a point) deflation.



109 *Profile of PS-InSAR velocities  $U_p$  (in blue) and GNSS velocities  $U_p$  (NGL) with their uncertainties stacked in*  
110 *20 km (in black) and 40 km (in gray) along the profile AB (see location in Figure 3). Topography/depth is rep-*  
111 *resented without vertical exaggeration (V.E.x1).*
